# Supplementary material for: Inhibition of the serine protease HtrA1 by SerpinE2 suggests an extracellular proteolytic pathway in the control of neural crest migration
Source: PubMed Central journal article supplement (PMC11026092; doi:10.7554/elife.91864), 2024-04-18

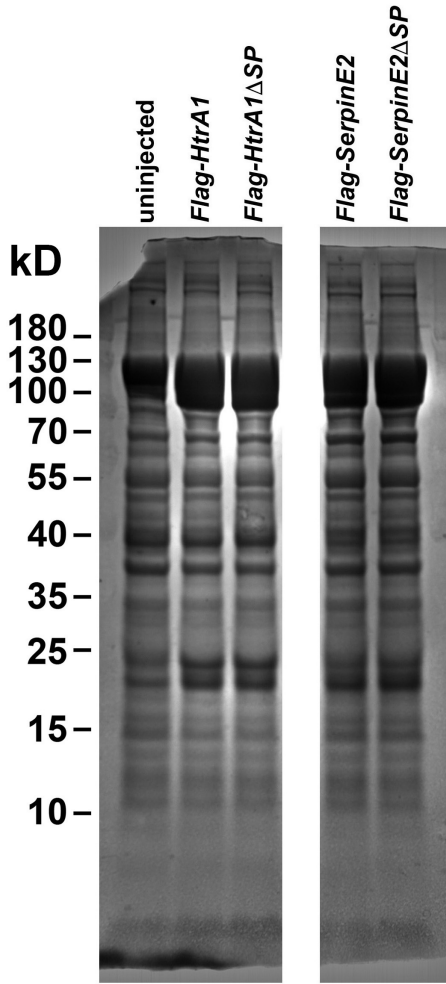

Coomassie-Blue (Gel)

*Xenopus* embryos (stage 10.5)

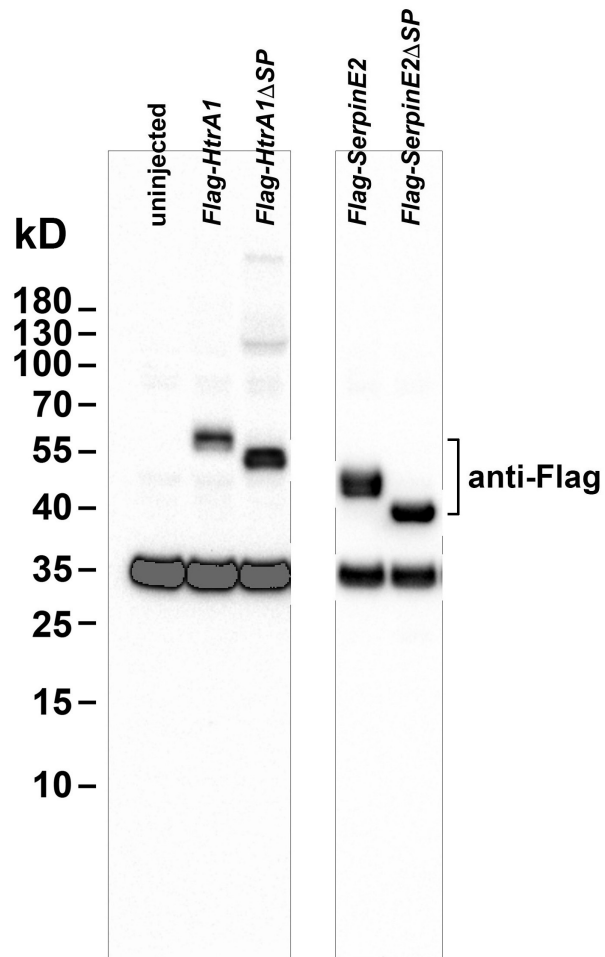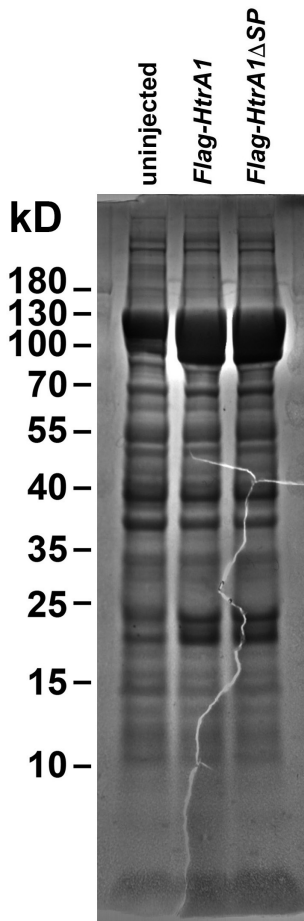

Coomassie-Blue (Gel)

*Xenopus* embryos (stage 10.5)

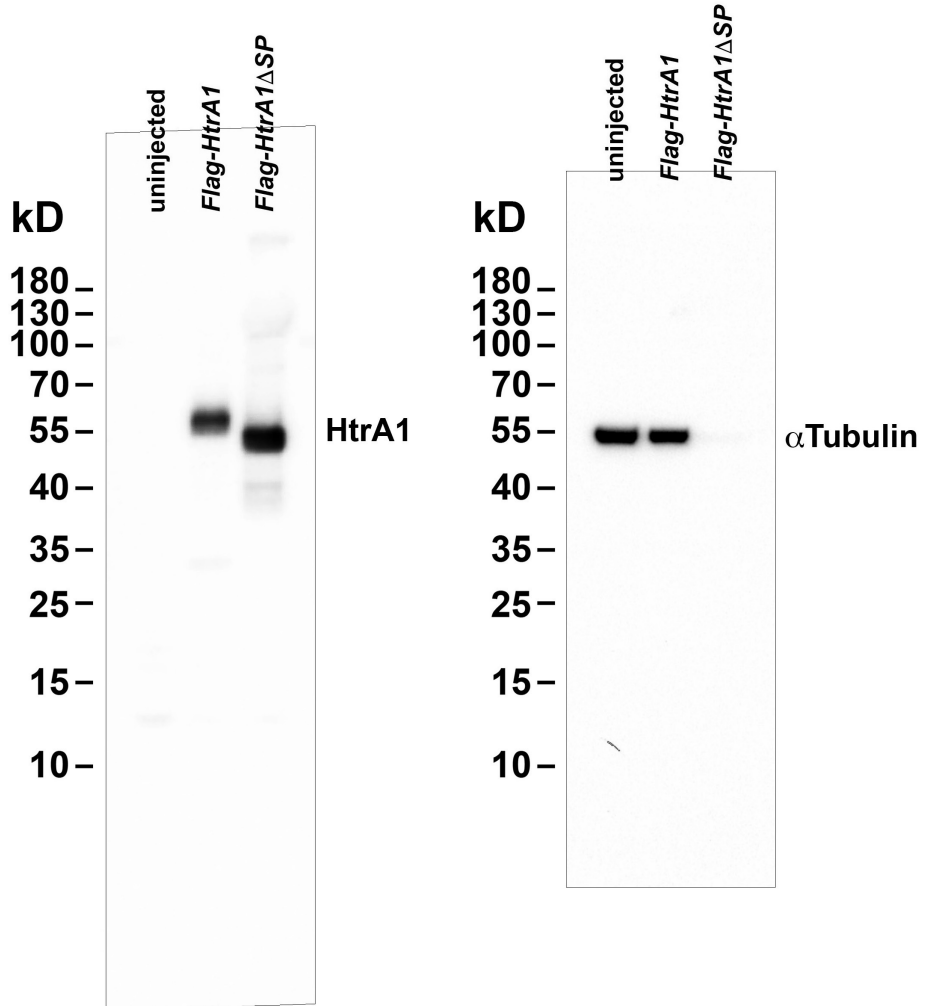

Supplement: elife-91864-fig6-figsupp2-data3.pdf [file elife-91864-fig6-figsupp2-data3.pdf]
