# Supplementary material for: Inhibition of the serine protease HtrA1 by SerpinE2 suggests an extracellular proteolytic pathway in the control of neural crest migration
Source: eLife journal article supplement (doi:10.7554/elife.91864), 2023-10-12
Supplement: fig6-figsupp2-data1 [file elife-91864-fig6-figsupp2-data1-v1.pdf]

control  
Flag-HtrA1  
Flag-HtrA1ΔSP  
Flag-Serpine2  
Flag-Serpine2ΔSP

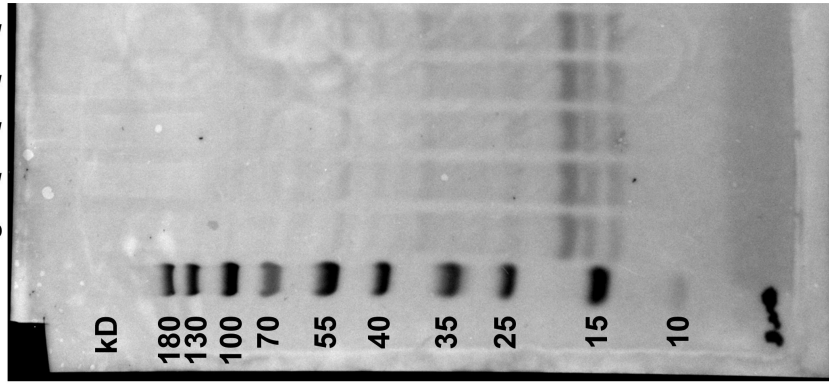

Ponceau  
Red

control  
Flag-HtrA1  
Flag-HtrA1ΔSP  
Flag-Serpine2  
Flag-Serpine2ΔSP

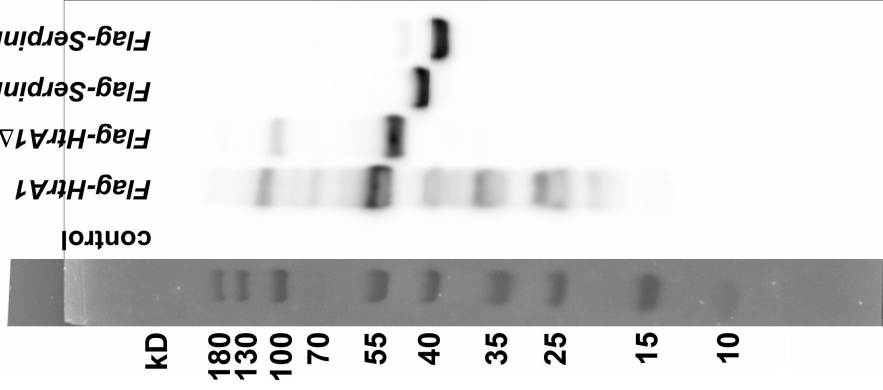

anti-Flag

control  
Flag-HtrA1  
Flag-HtrA1ΔSP  
Flag-Serpine2  
Flag-Serpine2ΔSP

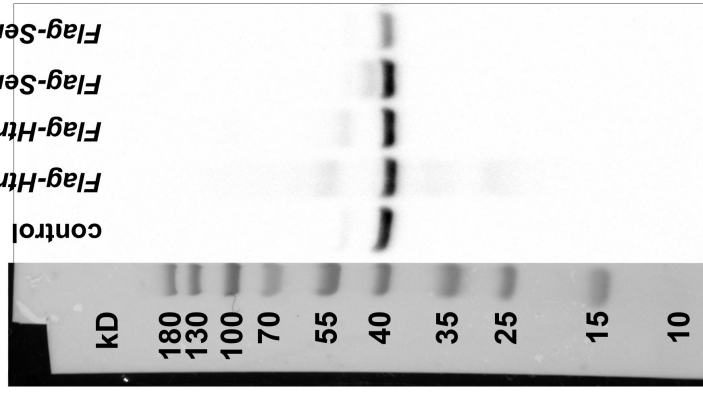

βActin

control  
Flag-HtrA1  
Flag-HtrA1ΔSP  
Flag-Serpine2  
Flag-Serpine2ΔSP

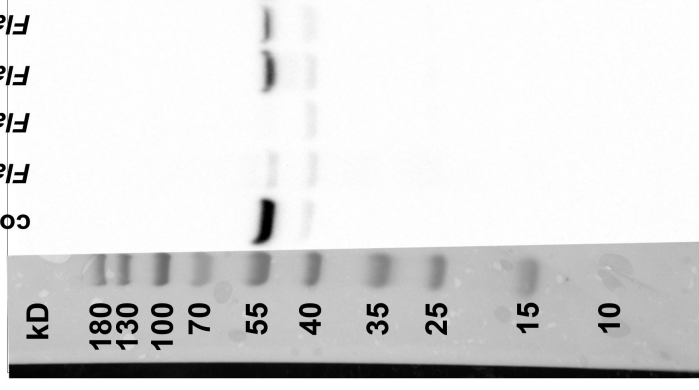

αTubulin

HEK293T cells - CELL LYSATE
