# Supplementary material for: Inhibition of the serine protease HtrA1 by SerpinE2 suggests an extracellular proteolytic pathway in the control of neural crest migration
Source: eLife journal article supplement (doi:10.7554/elife.91864), 2023-10-12

HEK293T cells - SUPERNATANT

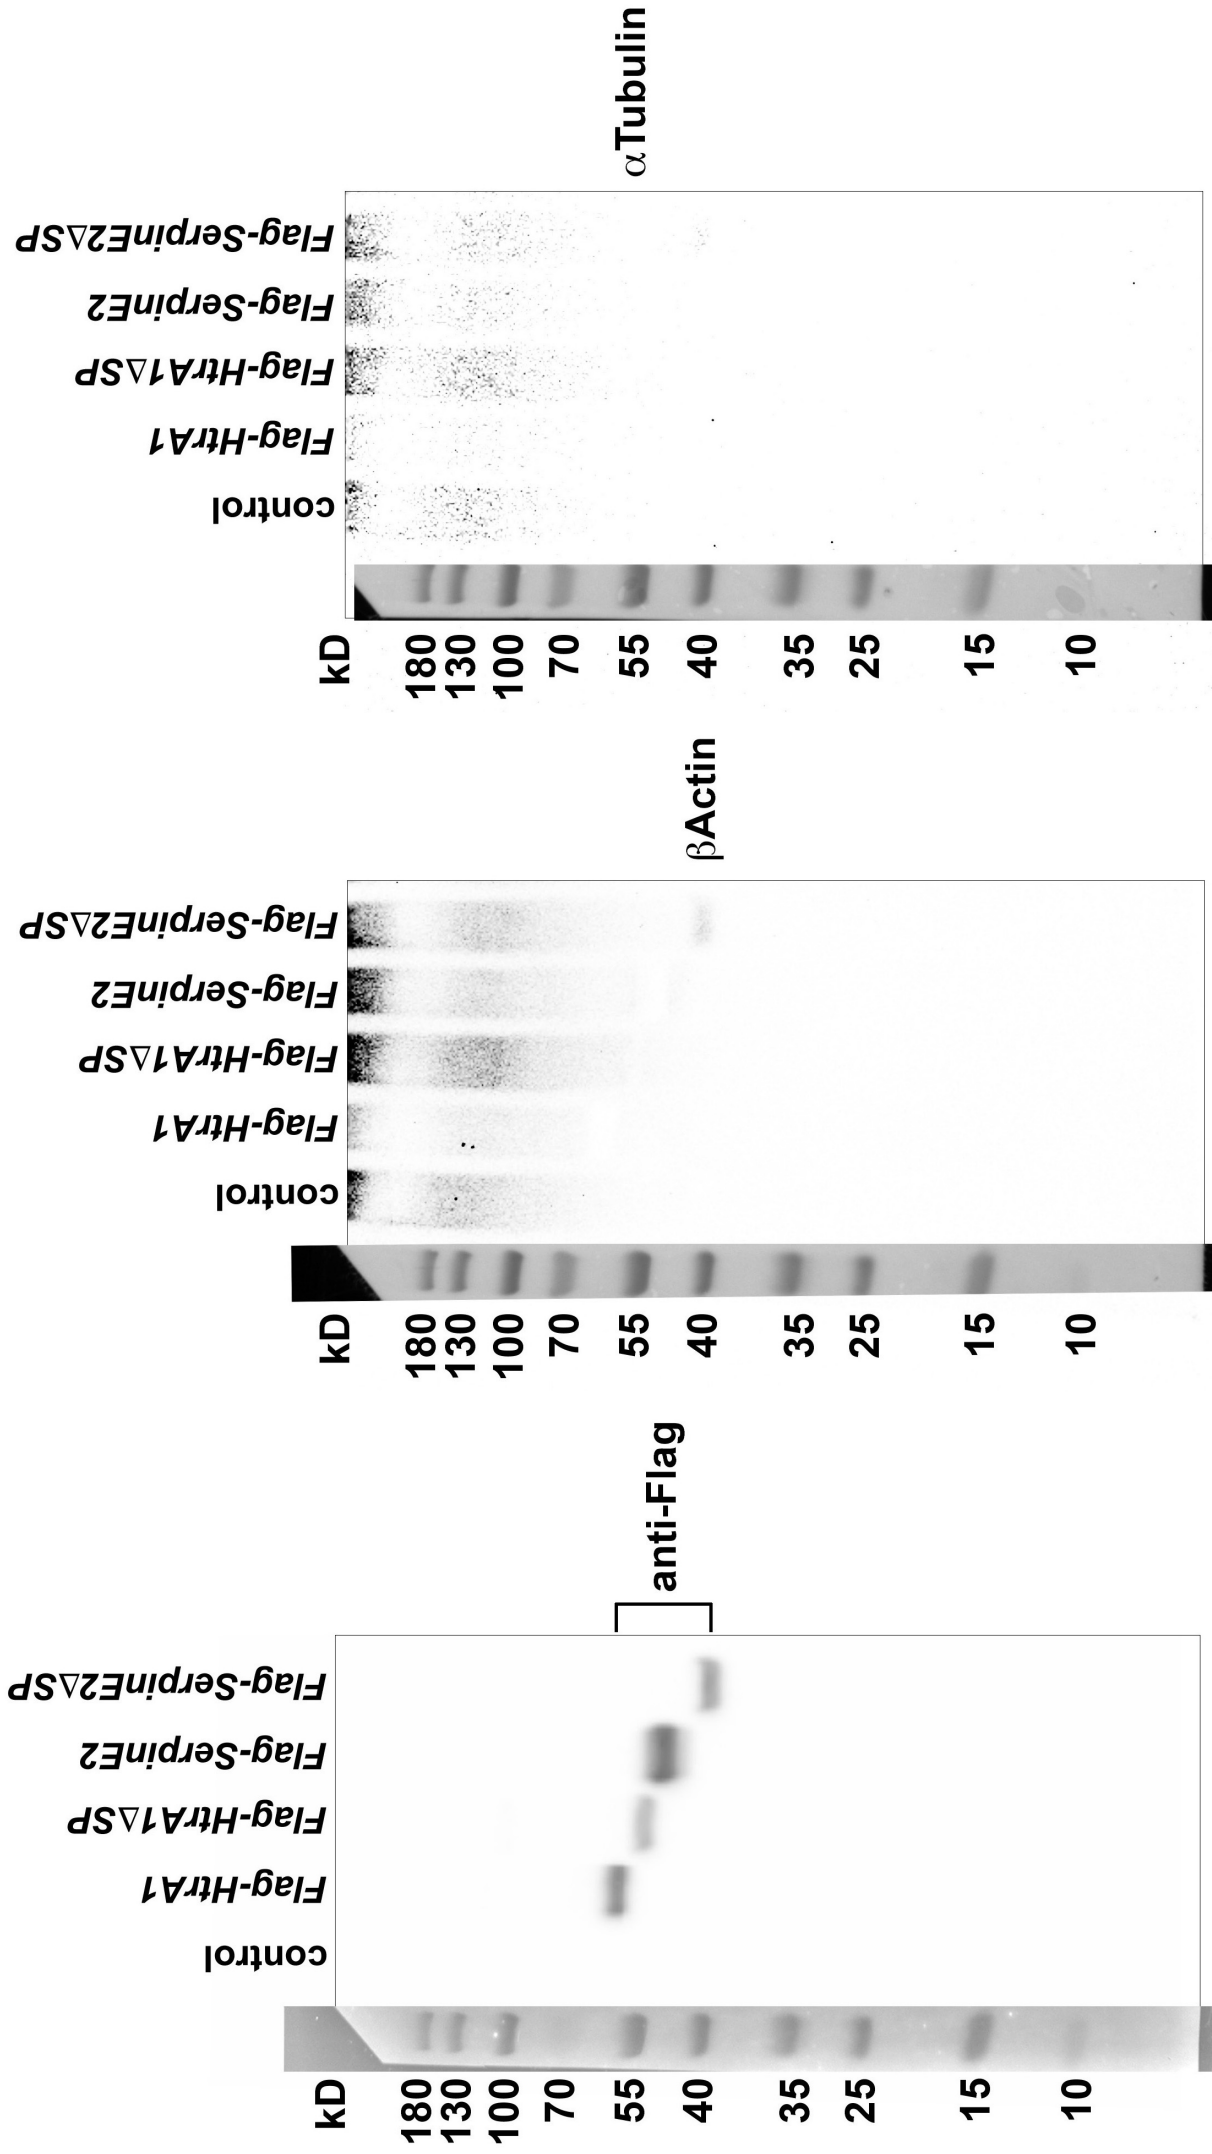

Supplement: fig6-figsupp2-data2 [file elife-91864-fig6-figsupp2-data2-v1.pdf]
